# Supplementary material for: Study of deposition parameters and growth kinetics of ZnO deposited by aerosol assisted chemical vapor deposition
Source: Royal Society of Chemistry journal article supplement (doi:10.1039/d1ra03251h), 2021-01-01

## Electronic supplementary information

### Study of deposition parameters and growth kinetics of ZnO deposited by Aerosol Assisted Chemical Vapor Deposition

#### 1.-Supplementary information

The atomizer performance is important to understand the process and the influence of the variables, specially the flow effect. To better understand the operation of the atomizer the following graphics are presented, Fig. 1 and Fig. 2. They show the influence of the parameters that can be modified in the atomizer, they are the pre-pressure gas flow and the number of turns of one micrometer screw. For this work, the pre-pressure has been selected at 1.5 bar and the number of the micrometer screws turns (Skt) used have been 4.5, 6 and 8. As it is shown in the Fig. 1, the number of Skt used correspond to a flow of 4, 6 and 8 L/min respectively. Fig. 2 shows that the particle production

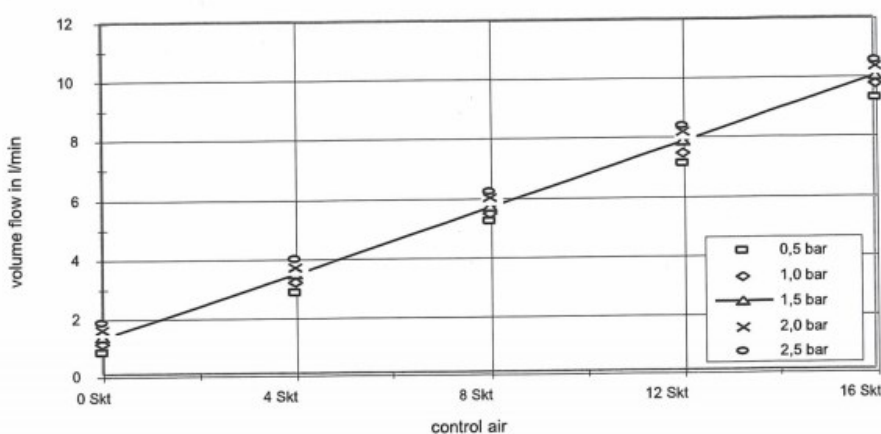

rate for the different Skt used is practically the same for a pre-pressure of 1.5 bar.

Fig. 1. Number of flow volume depending the screw turns of the atomizer.

Fig. 2. Dependence of particle production rate from pre-pressure depending on the number of screw turns.

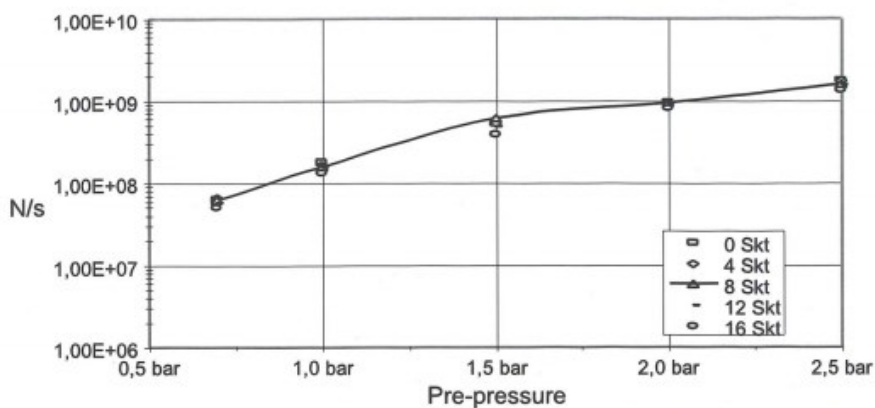

Supplement: d1ra03251h1.pdf [file d1ra03251h1.pdf]
